# Supplementary material for: Development of a flow method for the hydroboration/oxidation of olefins
Source: Royal Society of Chemistry journal article supplement (doi:10.1039/c5ob00170f), 2015-01-01

## Development of a flow method for the hydroboration/oxidation of olefins

José A. Souto and Steven V. Ley.

|                                                                                                         |      |
|---------------------------------------------------------------------------------------------------------|------|
| 1. NMR spectra data.....                                                                                | S-2  |
| 1.1. ((1 <i>R</i> ,2 <i>S</i> ,5 <i>R</i> )-6,6-dimethylbicyclo[3.1.1]heptan-2-yl)methanol 2a.....      | S-2  |
| 1.2. 1-Hexanol 2b.....                                                                                  | S-3  |
| 1.3. 1-Octanol 2c.....                                                                                  | S-4  |
| 1.4. 2-(2,2-dimethyl-1,3-dioxolan-4-yl)pentan-1-ol 2d.....                                              | S-5  |
| 1.5. 7,8-bis(( <i>tert</i> -butyldimethylsilyl)oxy)octan-1-ol 2e.....                                   | S-6  |
| 1.6. (1 <i>R</i> ,2 <i>R</i> ,3 <i>R</i> ,5 <i>S</i> )-2,6,6-Trimethylbicyclo[3.1.1]heptan-3-ol 2f..... | S-7  |
| 1.7. Cyclooctanol 2g.....                                                                               | S-8  |
| 1.8. 6-Hydroxyhexanenitrile 2h.....                                                                     | S-9  |
| 1.9. (5 <i>S</i> )-5-(1-Hydroxypropan-2-yl)-2-methylcyclohexan-1-ol 2i.....                             | S-10 |
| 1.10. 2-Phenylethan-1-ol 2j.....                                                                        | S-11 |
| 1.11. 2-Phenylpropan-1-ol 2k.....                                                                       | S-12 |
| 1.12. 2,2-Diphenylethan-1-ol 2l.....                                                                    | S-13 |

## 1. NMR spectra data

### 1.1. ((1*R*,2*S*,5*R*)-6,6-dimethylbicyclo[3.1.1]heptan-2-yl)methanol 2a.

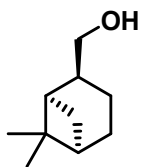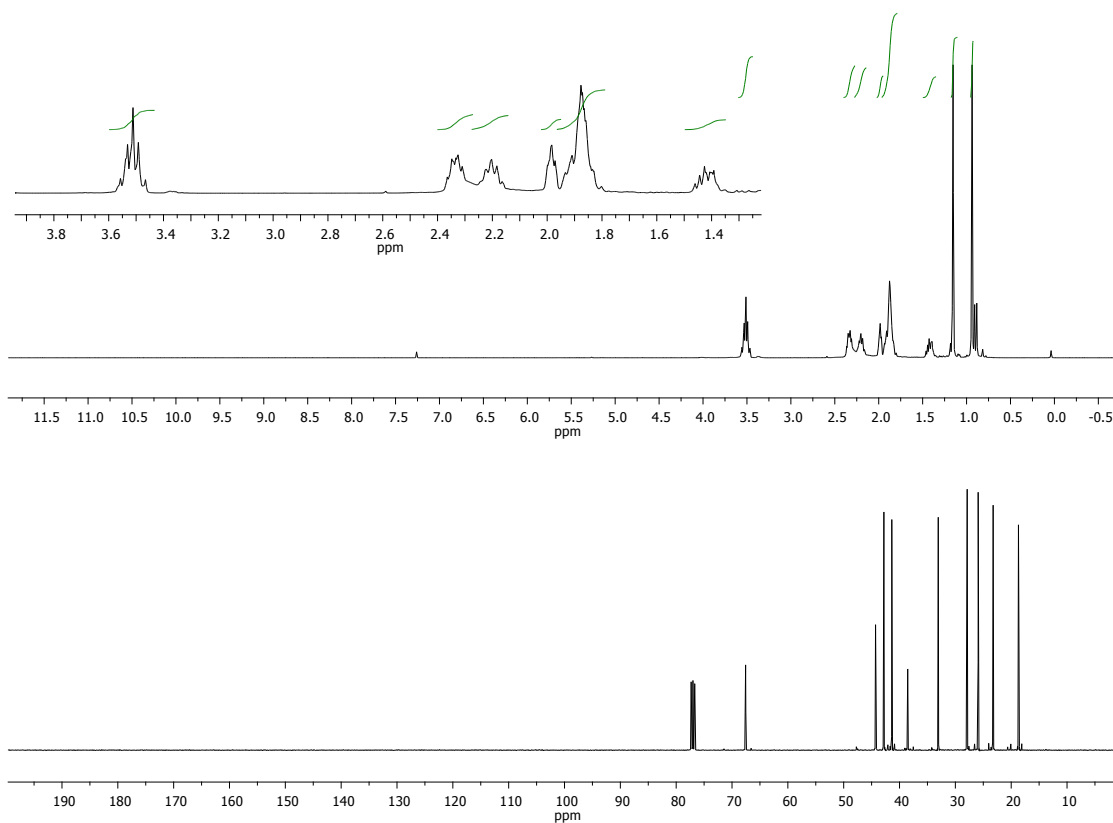

## 1.2. 1-Hexanol 2b.

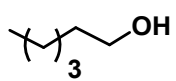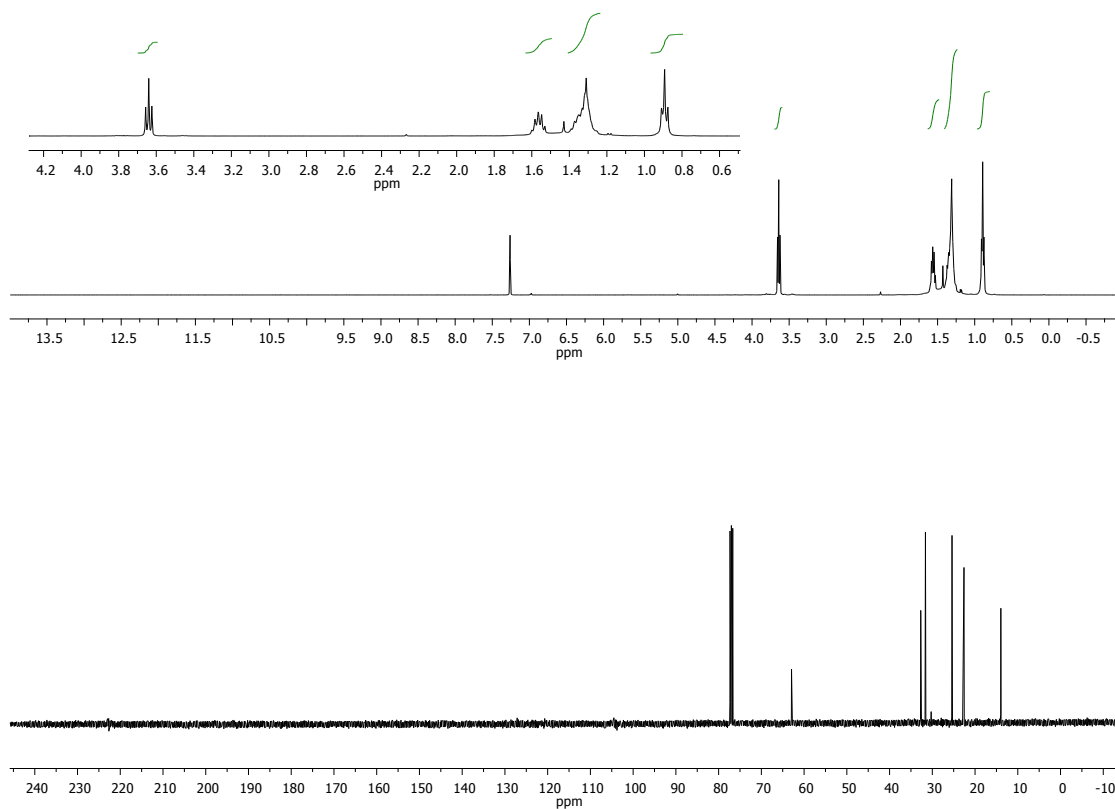

### 1.3. 1-Octanol 2c.

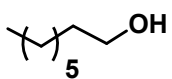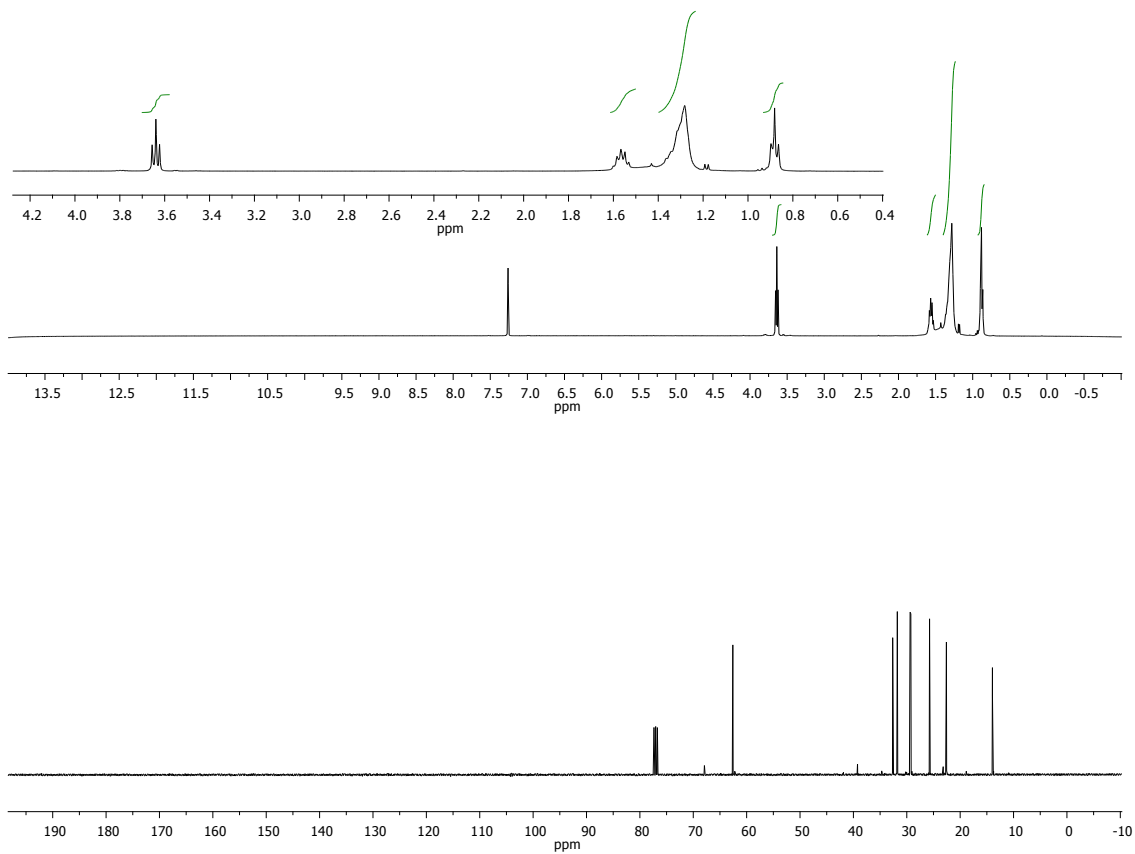

1.4. 2-(2,2-dimethyl-1,3-dioxolan-4-yl)pentan-1-ol 2d.

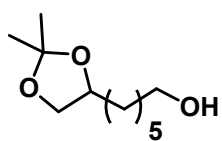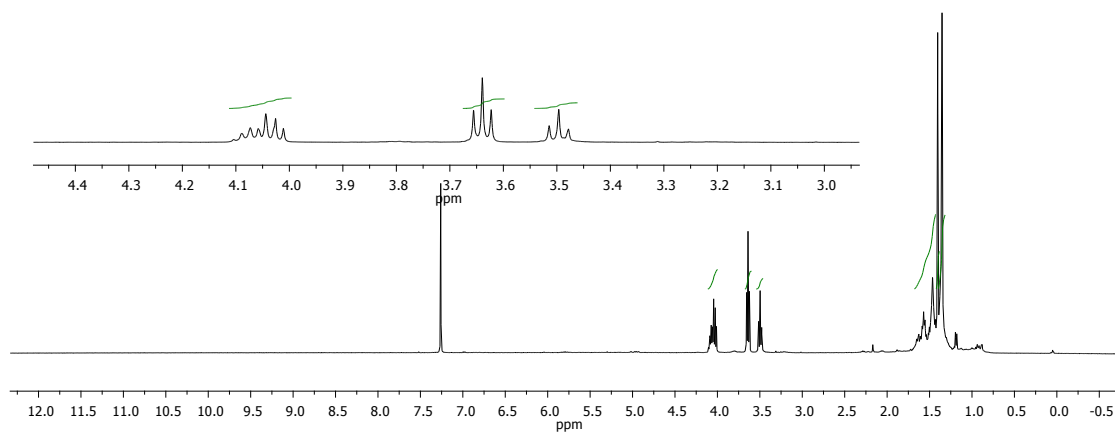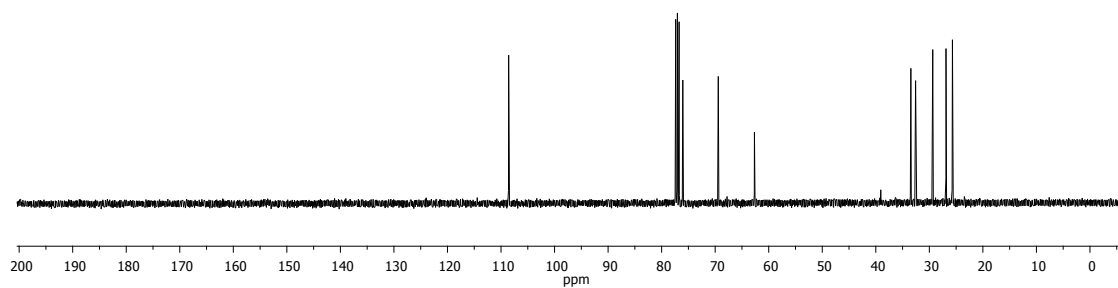

1.5. 7,8-bis((*tert*-butyldimethylsilyl)oxy)octan-1-ol 2e.

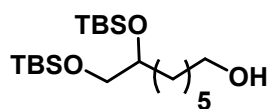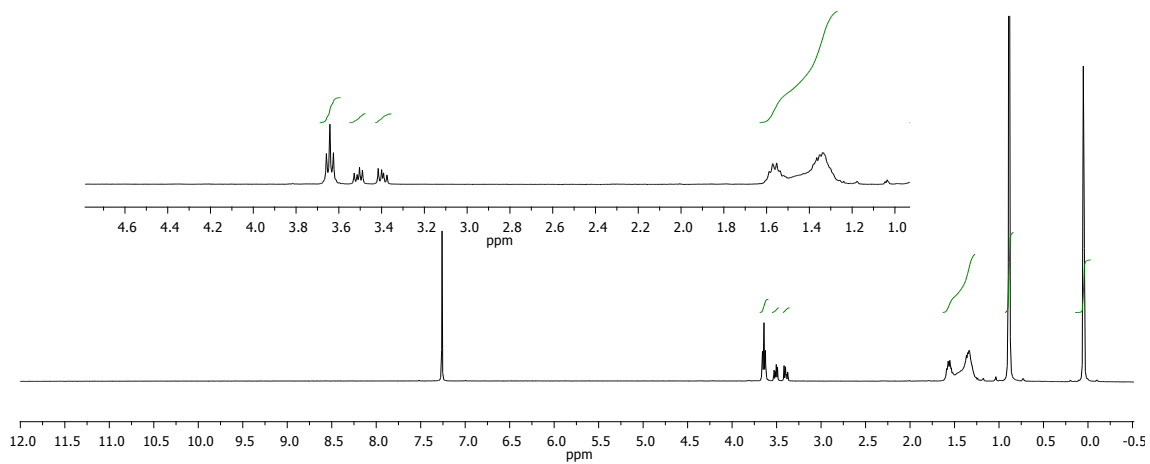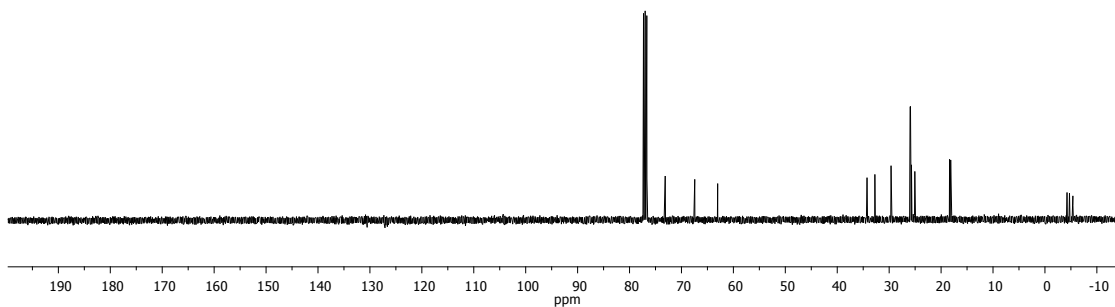

1.6. (1*R*,2*R*,3*R*,5*S*)-2,6,6-Trimethylbicyclo[3.1.1]heptan-3-ol 2f.

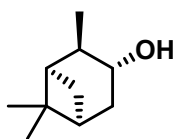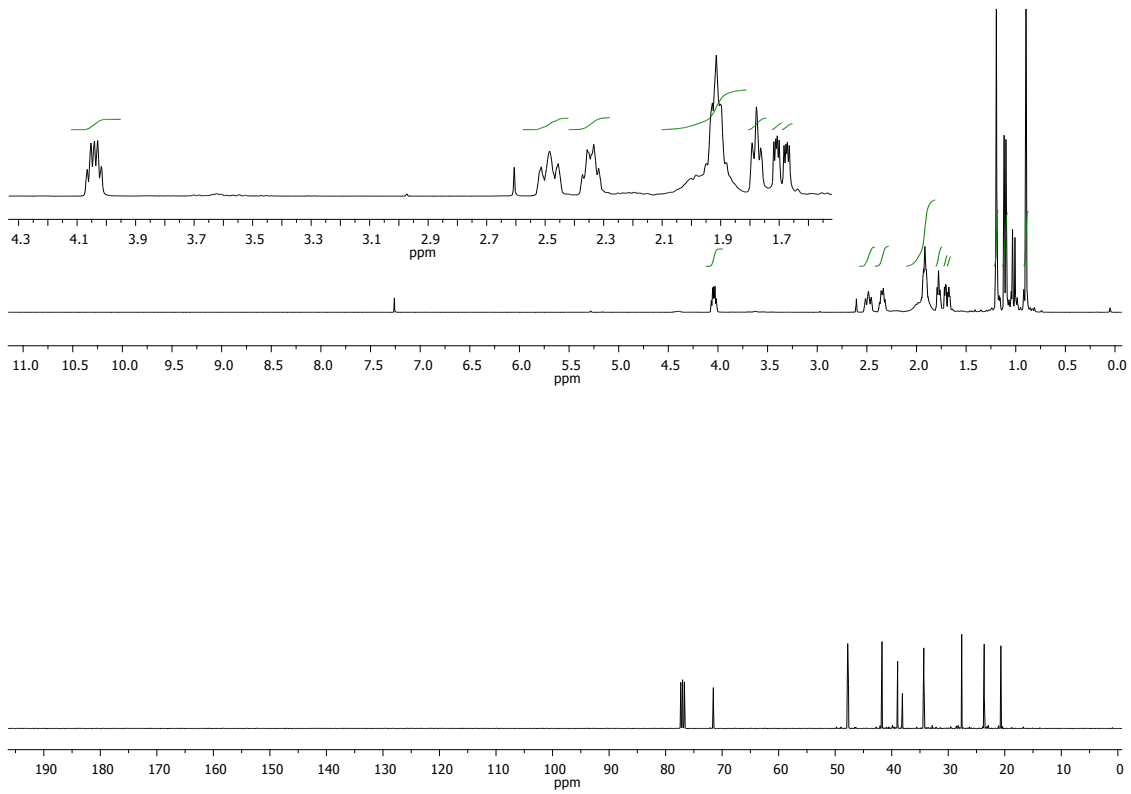

### 1.7. Cyclooctanol 2g.

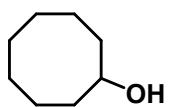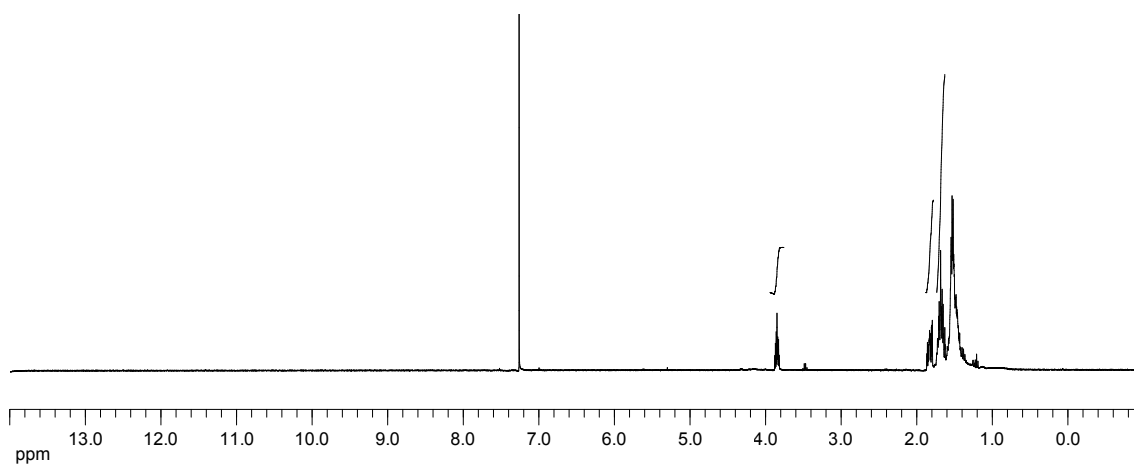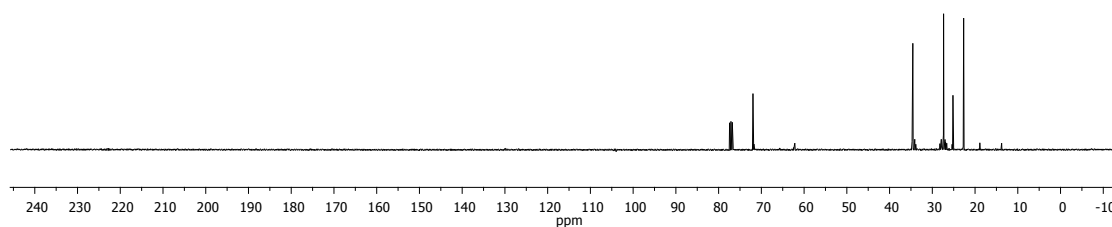



### 1.8. 6-Hydroxyhexanenitrile 2h.

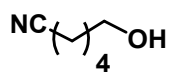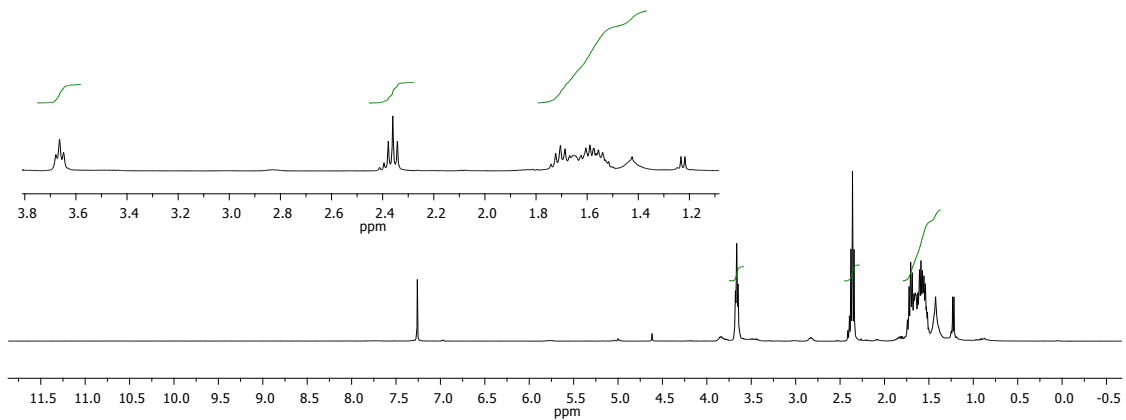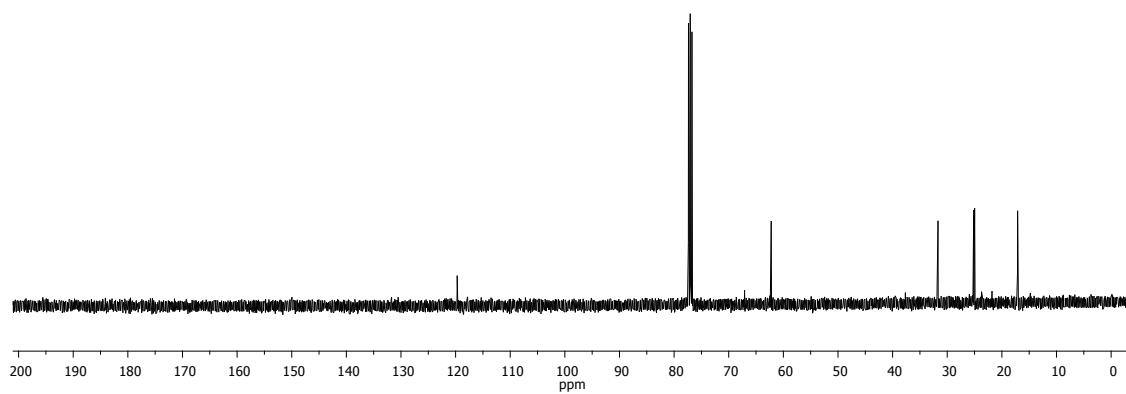

1.9. (5*S*)-5-(1-Hydroxypropan-2-yl)-2-methylcyclohexan-1-ol 2i.

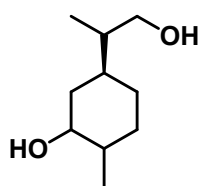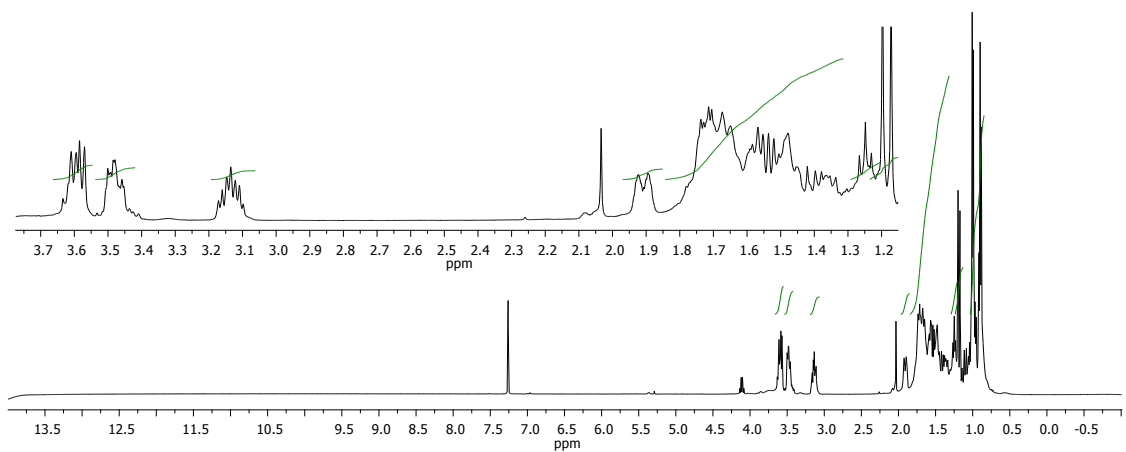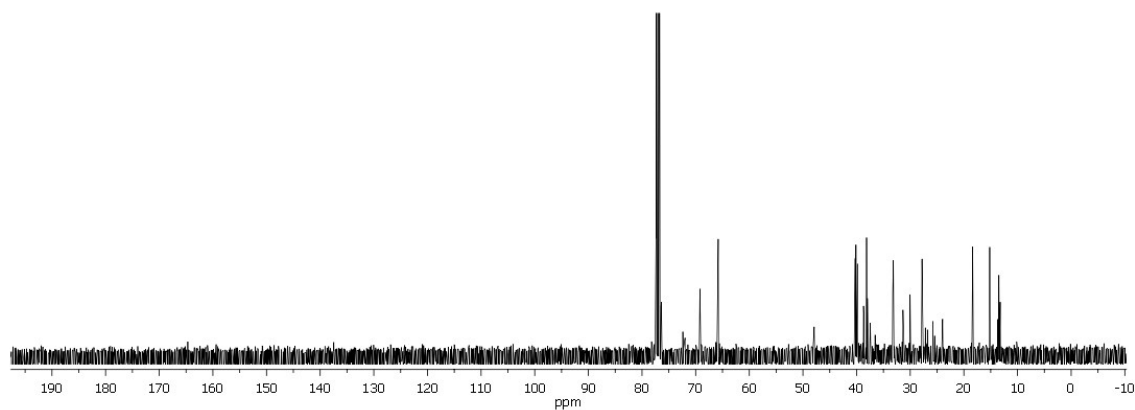

1.10. 2-Phenylethan-1-ol 2j.

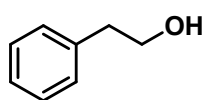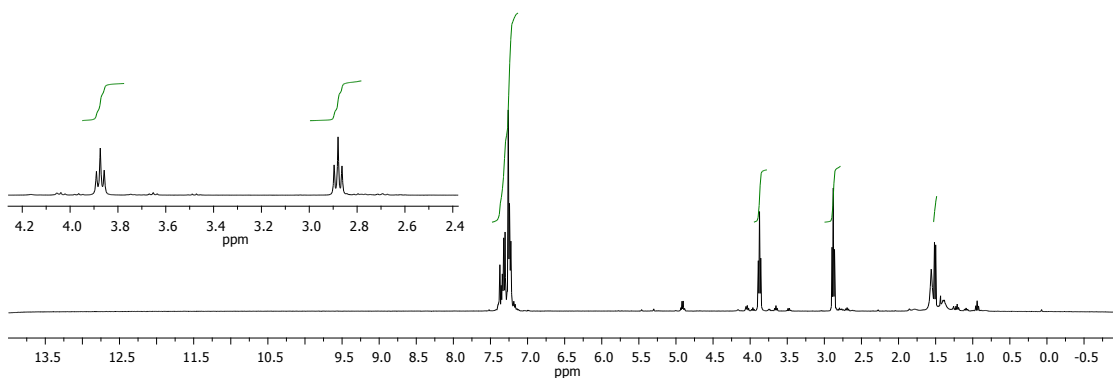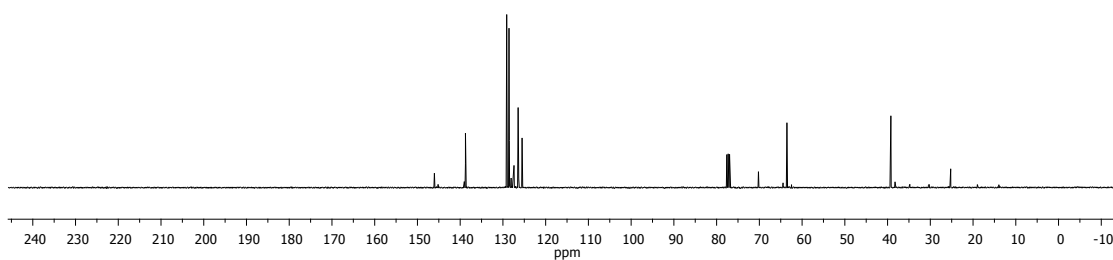

1.11. 2-Phenylpropan-1-ol 2k.

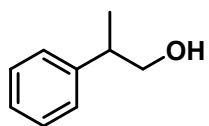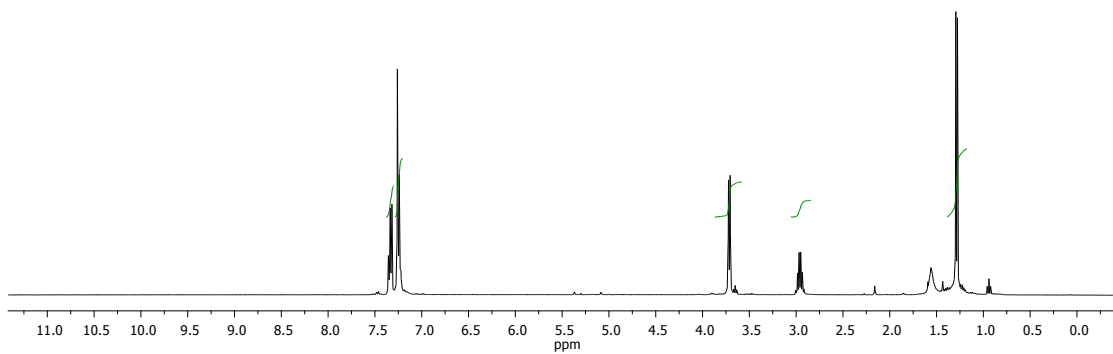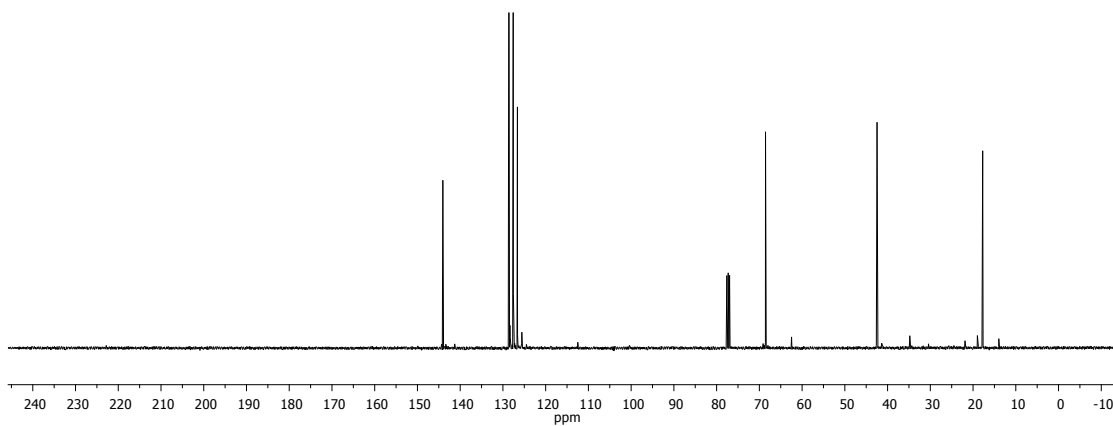

1.12. 2,2-Diphenylethan-1-ol 2l.

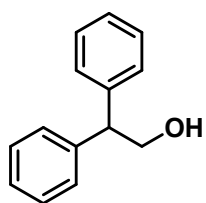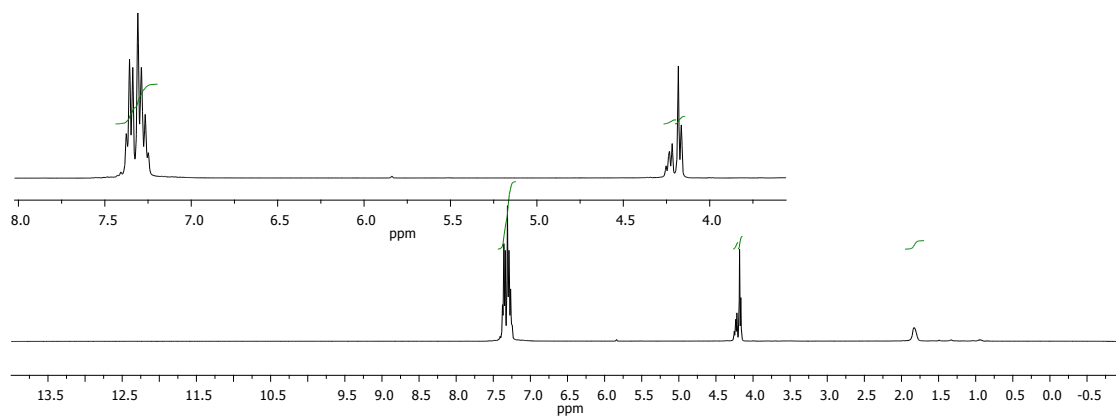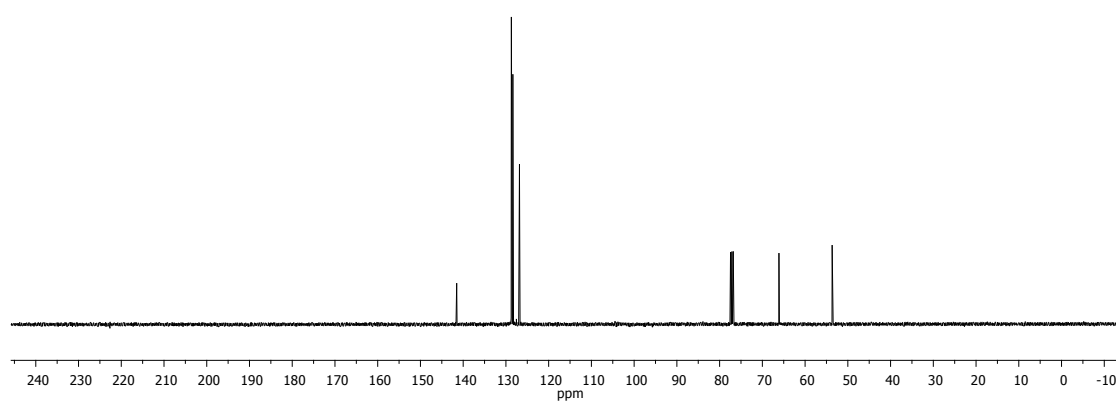

Supplement: c5ob00170f1.pdf [file c5ob00170f1.pdf]
